# Supplementary material
Source: publisher figshare collection journal article supplement (https://frontiersin.figshare.com/ndownloader/files/17944133)
Supplement: Supplementary file 1 [file 17944133]

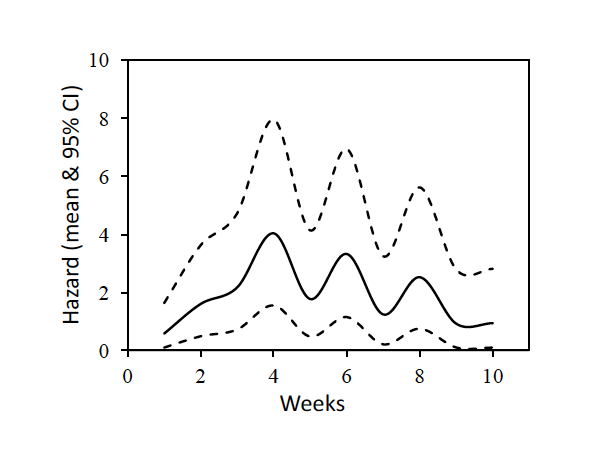


**Fig. S1.** Hazard curve over a 10 week period for *Prunus serotina* seedlings.

**Table S1.** Parameter estimates (mean posterior values and 95% CI) for fixed-effects coefficient for soil source treatments, β parameters for *Prunus serotina* seedlings in high light. The fixed-effect coefficient for initial seed size is across all light levels and is bold because the parameter is statistically significant, 95% CI did not include zero.

|  | By soil source: | | | | | | | | | | | |
| --- | --- | --- | --- | --- | --- | --- | --- | --- | --- | --- | --- | --- |
|  | **Site 1: ice contact** | | | | **Site 2: mesic ice contact** | | | | **Site 3: poor moraine** | | | |
|  | **Conspecific** | | **Heterospecific** | | **Conspecific** | | **Heterospecific** | | **Conspecific** | | **Heterospecific** | |
| Size | **sterile** | **non-sterile** | **sterile** | **non-sterile** | **sterile** | **non-sterile** | **sterile** | **non-sterile** | **sterile** | **non-sterile** | **sterile** | **non-sterile** |
| -1.0  (-1.6, -0.4) | 28.7  (6.1, 72.1) | 4.7  (2.7, 7.8) | 4.2  (2.7, 6.1) | 28.5  (5.9, 72.4) | 28.5  (5.6, 72.8) | 5.0  (3.0, 8.2) | 5.2  (3.2, 8.2) | 28.6  (5.9, 72.2) | 5.0  (2.9, 8.1) | 28.4  (5.7, 72.8) | 29.0  (6.2, 73.0) | 4.8  (2.8, 7.9) |

| Site 4: moraine1 | | | | Site 5: moraine2 | | | |
| --- | --- | --- | --- | --- | --- | --- | --- |
| Conspecific | | **Heterospecific** | | **Conspecific** | | **Heterospecific** | |
| sterile | **non-sterile** | **sterile** | **non-sterile** | **sterile** | **non-sterile** | **sterile** | **non-sterile** |
| 5.5  (3.5, 8.8) | 28.8  (5.9, 72.4) | 5.5  (3.5, 8.6) | 3.5  (2.3, 5.1) | 1.2  (-0.5, 3.2) | 4.6  (2.6, 7.8) | 4.8  (2.8, 7.9) | 5.0  (3.0, 8.1) |
|  | |  |  |  |  |  | | | |

**Table S2.** Parameter estimates (mean posterior values and 95% CI) for fixed-effects coefficient for soil source treatments, β parameters for *Prunus serotina* seedlings in low light. The fixed-effect coefficient for initial seed size is across all light levels.

| By soil source: | | | | | | | | | | | |
| --- | --- | --- | --- | --- | --- | --- | --- | --- | --- | --- | --- |
| Site 1: ice contact | | | | **Site 2: mesic ice contact** | | | | **Site 3: poor moraine** | | | |
| Conspecific | | **Heterospecific** | | **Conspecific** | | **Heterospecific** | | **Conspecific** | | **Heterospecific** | |
| sterile | **non-sterile** | **sterile** | **non-sterile** | **sterile** | **non-sterile** | **sterile** | **non-sterile** | **sterile** | **non-sterile** | **sterile** | **non-sterile** |
| 4.6  (2.6, 7.7) | 28.6  (5.7, 72.1) | 5.2  (3.1, 8.3) | 5.7  (3.6, 8.9) | 28.7  (5.7, 72.9) | 5.4  (3.3, 8.5) | 28.2  (5.3, 71.9) | 3.3  (2.2, 4.6) | 5.0  (3.0, 8.2) | 2.6  (1.4, 3.9) | 5.3  (3.3, 8.5) | 5.4  (3.4, 8.5) |

| Site 4: moraine1 | | | | Site 5: moraine2 | | | |
| --- | --- | --- | --- | --- | --- | --- | --- |
| Conspecific | | **Heterospecific** | | **Conspecific** | | **Heterospecific** | |
| sterile | **non-sterile** | **sterile** | **non-sterile** | **sterile** | **non-sterile** | **sterile** | **non-sterile** |
| 28.4  (5.8, 71.2) | 4.0  (2.5, 5.9) | 4.3  (2.9, 5.9) | 3.5  (2.2, 5.0) | 2.9  (1.6, 4.4) | 3.8  (1.7, 6.8) | 5.0  (3.0, 8.1) | 2.5  (1.4, 3.7) |
|  |  |  |  |  |  | | | |

**Table S3.** Predicted survival values (mean and 95% CI based on parameter values from Appendix B.1) by soil source treatments (e.g., site, soil source and sterilization) for *Prunus serotina* seedlings in high light.

| By soil source: | | | | | | | | | | | |
| --- | --- | --- | --- | --- | --- | --- | --- | --- | --- | --- | --- |
| Site 1: ice contact | | | | **Site 2: mesic ice contact** | | | | **Site 3: poor moraine** | | | |
| Conspecific | | **Heterospecific** | | **Conspecific** | | **Heterospecific** | | **Conspecific** | | **Heterospecific** | |
| sterile | **non-sterile** | **sterile** | **non-sterile** | **sterile** | **non-sterile** | **sterile** | **non-sterile** | **sterile** | **non-sterile** | **sterile** | **non-sterile** |
| 100  (96, 100) | 77  (33, 99) | 72  (36, 96) | 100  (95, 100) | 99  (93, 100) | 82  (46, 99) | 85  (51, 99) | 100  (95, 100) | 82  (44, 99) | 99  (94, 100) | 100  (96, 100) | 79  (33, 99) |

| Site 4: moraine1 | | | | | | | Site 5: moraine2 | | | | | |
| --- | --- | --- | --- | --- | --- | --- | --- | --- | --- | --- | --- | --- |
| Conspecific | | | **Heterospecific** | | | | **Conspecific** | | | | **Heterospecific** | |
| sterile | **non-sterile** | | **sterile** | | **non-sterile** | | **sterile** | | **non-sterile** | | **sterile** | **non-sterile** |
| 89  (61, 100) | 100  (95, 100) | | 88  (66, 100) | | 57  (21, 88) | | 5  (0, 45) | | 75  (30, 99) | | 79  (36, 99) | 82  (45, 99) |
|  | |  | |  | |  | |  | |  | | | |

**Table S4.** Predicted survival values (mean and 95% CI based on parameter values from Appendix B.2) by soil source treatments (e.g., site, soil source and sterilization) for *Prunus serotina* seedlings in low light.

| By soil source: | | | | | | | | | | | |
| --- | --- | --- | --- | --- | --- | --- | --- | --- | --- | --- | --- |
| Site 1: ice contact | | | | **Site 2: mesic ice contact** | | | | **Site 3: poor moraine** | | | |
| Conspecific | | **Heterospecific** | | **Conspecific** | | **Heterospecific** | | **Conspecific** | | **Heterospecific** | |
| sterile | **non-sterile** | **sterile** | **non-sterile** | **sterile** | **non-sterile** | **sterile** | **non-sterile** | **sterile** | **non-sterile** | **sterile** | **non-sterile** |
| 76  (31, 99) | 99  (94, 100) | 84  (50, 100) | 90  (66, 100) | 99  (94, 100) | 87  (56, 100) | 99  (92, 100) | 50  (20, 82) | 82  (44, 99) | 26  (3, 65) | 87  (56, 100) | 87  (58, 100) |

| Site 4: moraine1 | | | | Site 5: moraine2 | | | |
| --- | --- | --- | --- | --- | --- | --- | --- |
| Conspecific | | **Heterospecific** | | **Conspecific** | | **Heterospecific** | |
| sterile | **non-sterile** | **sterile** | **non-sterile** | **sterile** | **non-sterile** | **sterile** | **non-sterile** |
| 100  (94, 100) | 66  (28, 95) | 74  (43, 94) | 55  (20, 87) | 35  (5, 78) | 57  (6, 98) | 82  (44, 99) | 24  (3, 60) |
|  |  |  |  |  |  | | | |

**Table S5.** Analysis of variance results for the main treatment effects and interactions of forest site and soil source (conspecific vs heterospecific) on nutrient supply rates (μg ion/PRS® Probe/3 wk) in non-sterile soil at high light.

| Dependent Variable | Source of Variation (*df*) | F | *P* | Means (SE) |
| --- | --- | --- | --- | --- |
| N (NO3- + NH4+) | Site (4)  Source (1)  Site x Source (4) | 13.85  0.07  2.08 | **<0.001**  0.79  0.16 | I = 214.2, mI = 288.6, pM = 397.8, M1 = 560.5, M2 = 456.9; (36.7)  Con = 388.0 vs. Hetero = 379.1; (23.2) |
| Ca2+ | Site (4)  Source (1)  Site x Source (4) | 2.48  1.72  0.60 | 0.11  0.22  0.67 | I = 1398.0, mI = 1368.6, pM = 1435.7, M1 = 1662.0, M2 =1585.6; (81.0)  Con = 1537.4 vs. Hetero = 1442.5; (51.2) |
| Mg2+ | Site (4)  Source (1)  Site x Source (4) | 7.05  4.65  4.58 | **0.01**  0.06  **0.02** | I (Con) = 1005.0, I (Hetero) = 764.2; (41.6)  mI (Con) = 867.0, mI (Hetero) = 849.2; (41.6)  pM (Con) = 809.9, pM (Hetero) = 835.6; (41.6)  M1 (Con) = 759.0, M1 (Hetero) = 635.8; (41.6)  M2 (Con) = 710.5, M2 (Hetero) = 783.2; (41.6) |
| K+ | Site (4)  Source (1)  Site x Source (4) | 4.38  1.91  0.48 | **0.03**  0.20  0.75 | I = 199.3, mI = 258.1, pM = 163.5, M1 = 112.8, M2 =148.3; (26.4)  Con = 160.1 vs. Hetero = 192.7; (16.7) |
| H2PO4- | Site (4)  Source (1)  Site x Source (4) | 4.66  2.47  0.81 | **0.02**  0.15  0.55 | I = 11.0, mI = 9.1, pM = 11.5, M1 = 7.0, M2 =23.6; (3.0)  Con = 10.3 vs. Hetero = 14.5; (1.9) |
| Fe3+ | Site (4)  Source (1)  Site x Source (4) | 7.06  3.84  2.86 | **0.01**  0.08  0.08 | I = 47.1, mI = 33.7, pM = 32.5, M1 = 24.8, M2 =21.7; (3.7)  Con = 28.7 vs. Hetero = 35.2; (2.4) |
| Mn2+ | Site (4)  Source (1)  Site x Source (4) | 11.20  0.04  3.95 | **<0.001**  0.84  **0.04** | I (Con) = 34.3, I (Het) = 32.2; (7.2)  mI (Con) = 24.7, mI (Hetero) = 13.3; (7.2)  pM (Con) = 46.0, pM (Hetero) = 78.7; (7.2)  M1 (Con) = 28.2, M1 (Hetero) = 25.0; (7.2)  M2 (Con) = 35.5, M2 (Hetero) = 14.8; (7.2) |
| Zn2+ | Site (4)  Source (1)  Site x Source (4) | 3.41  2.19  1.70 | 0.05  0.17  0.23 | I = 2.2, mI = 2.5, pM = 3.1, M1 = 3.9, M2 = 3.1; (0.4)  Con = 3.2 vs. Hetero = 2.7; (0.2) |
| B(OH)4 3+ | Site (4)  Source (1)  Site x Source (4) | 1.86  0.07  0.86 | 0.19  0.80  0.52 | I = 0.9, mI = 0.9, pM = 1.5, M1 = 1.1, M2 = 1.1; (0.2)  Con = 1.1 vs. Hetero = 1.1; (0.1) |
| Pb2+ | Site (4)  Source (1)  Site x Source (4) | 2.51  0.97  1.95 | 0.11  0.35  0.18 | I = 2.3, mI = 3.3, pM = 2.7, M1 = 2.1, M2 = 2.9; (0.3)  Con = 2.5 vs. Hetero = 2.8; (0.2) |
| Al3+ | Site (4)  Source (1)  Site x Source (4) | 5.10  0.29  1.01 | **0.02**  0.60  0.45 | I = 54.1, mI = 64.2, pM = 50.2, M1 = 43.6, M2 = 42.7; (3.9)  Con = 50.0 vs. Hetero = 51.9; (2.5) |
| Notes: Tests were performed using the Type III sum of squares from SPSS version 24. 20 PRS™ probe samples in model. Landform codes: I: ice contact; mI: mesic ice contact; pM: poor moraine; M: Moraine.  Soil source code: Con: conspecific; Hetero: heterospecific. | | | | |  |

**Table S6.** Analysis of variance results for the effects of light availability (L = 1% vs. H = 18% full sun) on nutrient supply rates (μg ion/PRS® Probe/3 wk) in non-sterile soils. Data is aggregated across forest site and species of tree culturing soil.

| Dependent Variable | F | P | Means (SE) | |
| --- | --- | --- | --- | --- |
| N (NO3- + NH4+) | 2.76 | 0.11 | L = 463.6 (34.0) vs. H = 383.6 (34.0) | |
| Ca2+ | 0.09 | 0.76 | L = 1508.2 (42.2) vs. H = 1490.0 (42.2) | |
| Mg2+ | 0.01 | 0.93 | L = 798.9 (22.2) vs. H = 801.9 (22.2) | |
| K+ | 2.05 | 0.16 | L = 148.0 (14.0) vs. H = 176.4 (14.0) | |
| H2PO4- | 0.05 | 0.82 | L = 11.9 (1.7) vs. H = 12.4 (1.7) | |
| Fe3+ | 3.26 | 0.08 | L = 24.7 (2.8) vs. H = 31.9 (2.8) | |
| Mn2+ | 1.38 | 0.25 | L = 26.4 (4.1) vs. H = 33.3 (4.1) | |
| Zn2+ | 0.77 | 0.39 | L = 3.2 (0.2) vs. H = 2.9 (0.2) | |
| B(OH)4 3+ | 0.40 | 0.53 | L = 1.0 (0.1) vs. H = 1.1 (0.1) | |
| Pb2+ | 0.45 | 0.51 | L = 2.5 (0.2) vs. H = 2.7 (0.2) | |
| Al3+ | 0.36 | 0.55 | L = 48.6 (2.8) vs. H = 51.0 (2.8) | |
| Notes: Tests were performed using the Type III sum of squares from SPSS version 25. 40 PRS™ probe samples and 1 df in model. | | | |

**Table S7.** Analysis of variance results for the effects of sterilization treatment (S = sterile vs. NS = non-sterile) on nutrient supply rates (μg ion/PRS® Probe/3 wk) in high light treatment. Data is aggregated across forest site and species of tree culturing soil.

| Dependent Variable | F | P | Means (SE) | |
| --- | --- | --- | --- | --- |
| N (NO3- + NH4+) | 0.69 | 0.41 | S = 353.0 (26.0) vs. NS = 383.6 (26.0) | |
| Ca2+ | 3.28 | 0.08 | S = 1378.2 (43.6) vs. NS = 1490.0 (43.6) | |
| Mg2+ | 3.89 | 0.06 | S = 743.2 (21.1) vs. NS = 802.0 (21.1) | |
| K+ | 3.35 | 0.08 | S = 217.4 (15.8) vs. NS = 176.4(15.8) | |
| H2PO4- | 4.22 | **0.05** | S = 20.3 (2.7) vs. NS = 12.4 (2.7) | |
| Fe3+ | 2.49 | 0.12 | S = 38.4 (2.9) vs. NS = 31.9 (2.9) | |
| Mn2+ | 30.32 | **<0.001** | S = 97.9 (8.3) vs. NS = 33.3 (8.3) | |
| Zn2+ | 4.48 | **0.04** | S = 3.8 (0.3) vs. NS = 2.9 (0.3) | |
| B(OH)4 3+ | 0.00 | 0.98 | S = 1.1 (0.1) vs. NS = 1.1 (0.1) | |
| Pb2+ | 4.39 | **0.04** | S = 3.4 (0.3) vs. NS = 2.7 (0.3) | |
| Al3+ | 3.59 | 0.07 | S = 44.0 (2.6) vs. NS = 51.0 (2.6) | |
| Notes: Tests were performed using the Type III sum of squares from SPSS version 25. 40 PRS™ probe samples and 1 df in model. | | | |

**Table S8.** Results for studies (with variety of methodologies) that investigate how light availability influences plant soil-feedbacks.

| **Study** | **Species** | **Soil culturing** | **Soil collection location** | **Soil collection time** | **Soil sampling** | **Inoculant type (%)** | **Light treatment (%)** | **PSF results** |
| --- | --- | --- | --- | --- | --- | --- | --- | --- |
| Current study | *P.serotina* in conspecific vs. *Q. rubra* soil  *Q. rubra* in conspecific vs*. P. serotina* soil | Forest | Manistee National Forest, Manistee MI, USA (I, mI, pM, M1 & M2) | Spring (April) | Individual | Whole soil (25%) | Applied during seedling response phase (1% and 18% full sun) | - PSF shifted from negative in soils from low fertility sites to positive from high fertility sites - Occurs at high light - Driven largely by biotic factors - Neutral PSF |
| McCarthy-Neumann & Kobe (2010) | *Q. rubra* in conspecific vs. *A. rubrum*, *A. saccharum*, or *F. americana* soil | Forest | Manistee National Forest, Manistee MI, USA (pM, M1 & M2) | Winter (November) | Mixed | Microbial wash without mycorrhizal spores (5%) | Applied during seedling response phase (2% and 22% full sun) | - Positive PSF - Occurs at low light - Driven by biotic factors in conspecific soil and abiotic factors in heterospecific soil |
| McCarthy-Neumann & Ibáñez (2012) | *P.serotina*  in conspecific vs. *Q. rubra* soil  *Q. rubra* in conspecific vs. *P.serotina* soil | Forest | Horner McLaughlin Woods, Ann Arbor, MI USA | Winter (November) | Mixed | Whole soil (25%) | Applied during seedling response phase (1% , 4% and 29% full sun) | - Negative PSF - Occurs at low light - Driven by biotic factors - Neutral PSF |
| McCarthy-Neumann & Ibáñez (2013) | *P.serotina* in conspecific vs. heterospecific soil  *Q. rubra* in conspecific vs. heterospecific soil | Forest | Horner McLaughlin Woods, Ann Arbor, MI USA | Winter (November) | Mixed | Whole soil (25%) | Applied during seedling response phase (1% , 4% and 29% full sun) | - Negative PSF - Occurs at low light - Driven by biotic factors |
| Smith & Reynolds (2015) | 6 common forest understory species | Greenhouse | Griffy Woods, Bloomington, IN USA | Spring (April) | Mixed | Whole soil (50%) | Applied during soil culturing and seedling response phases (3%, 23% and 51% full sun) | - PSF shifted from negative at high light availability to weakly positive under low light |
